# Supplementary material for: Prediction of Crohn’s Disease Stricturing Phenotype Using a NOD2-derived Genomic Biomarker
Source: PubMed Central journal article supplement — Inflamm Bowel Dis. 2022 Sep 26;29(4):511–21. doi: 10.1093/ibd/izac205 (PMC10069659; doi:10.1093/ibd/izac205), 2022-09-26
Supplement: izac205_suppl_supplementary_figure_2.pdf [file izac205_suppl_supplementary_figure_2.pdf]

**A**

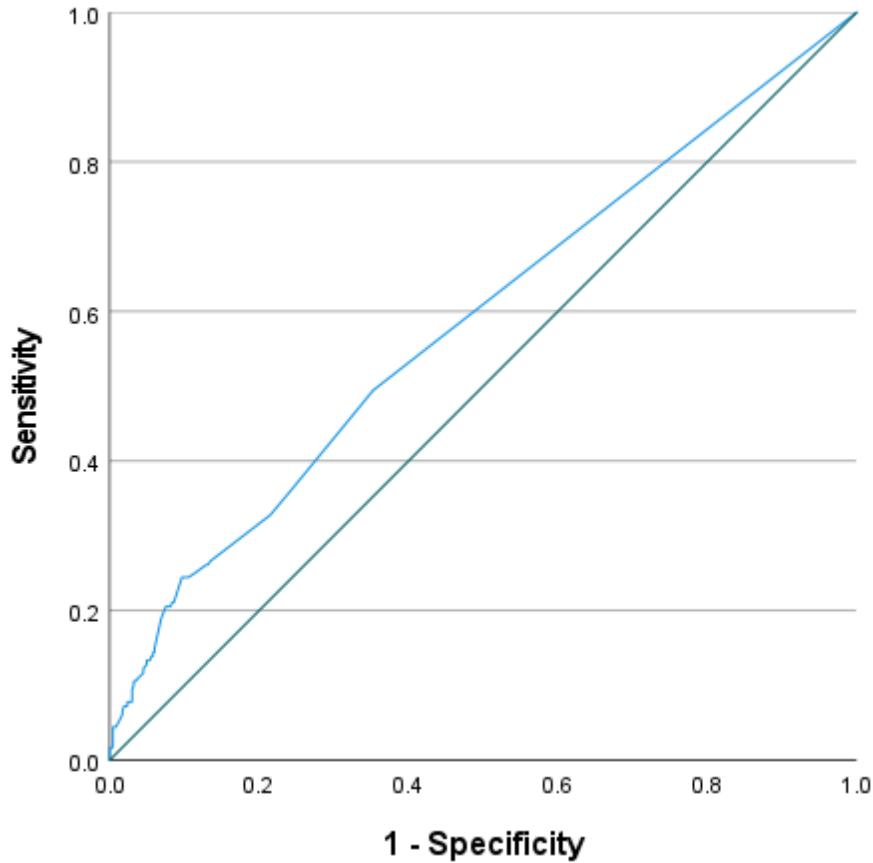

**Area Under the Curve**

Test Result Variable(s): NOD2

| Area | Std. Error <sup>a</sup> | Asymptotic Sig. <sup>b</sup> | Asymptotic 95% Confidence Interval |             |
|------|-------------------------|------------------------------|------------------------------------|-------------|
|      |                         |                              | Lower Bound                        | Upper Bound |
| .586 | .026                    | .001                         | .536                               | .637        |

**B**

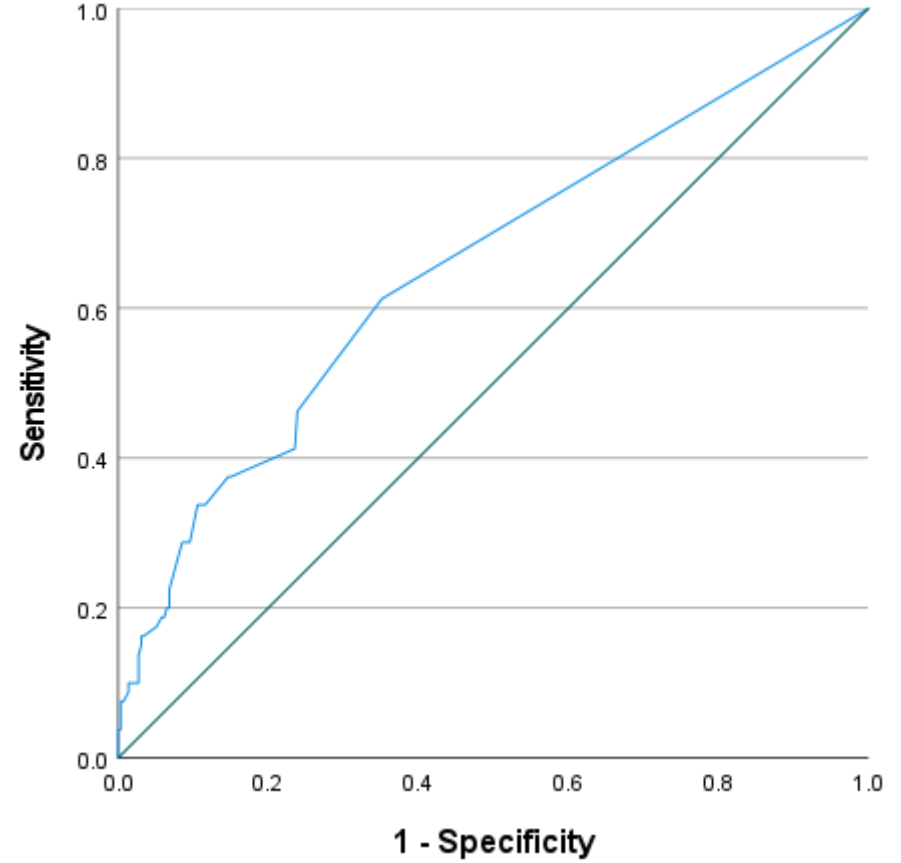

**Area Under the Curve**

Test Result Variable(s): NOD2

| Area | Std. Error <sup>a</sup> | Asymptotic Sig. <sup>b</sup> | Asymptotic 95% Confidence Interval |             |
|------|-------------------------|------------------------------|------------------------------------|-------------|
|      |                         |                              | Lower Bound                        | Upper Bound |
| .654 | .036                    | .000024                      | .583                               | .726        |
